# Supplementary material for: A micro surface tension pump (MISPU) in a glass microchip
Source: Royal Society of Chemistry journal article supplement (doi:10.1039/c0lc00037j), 2010-10-19
Supplement: c0lc00037j.pdf [file c0lc00037j.pdf]

## A micro surface tension pump (MISPU) on a glass microchip (Electronic Supplementary Information)

Xing Yue (Larry) Peng<sup>\*a</sup>

Received (in XXX, XXX) Xth XXXXXXXXXX 200X, Accepted Xth XXXXXXXXXX 200X

First published on the web Xth XXXXXXXXXX 200X

DOI: 10.1039/b000000x

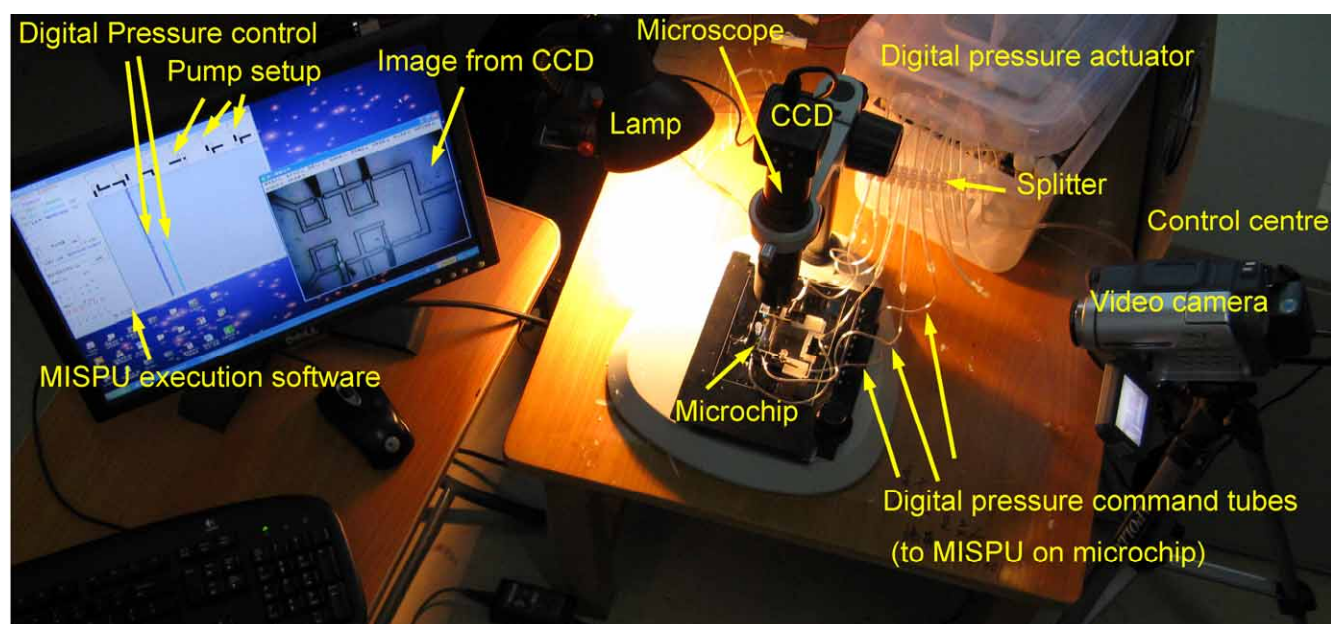

**Fig. S1 Test instrumentation setup.** The microchip for MISPU experiments under a microscope (1x objective) with a CCD was monitored by a video camera (illuminated by a lamp), simultaneously. A computer program set the digital pressures and the time schedule of a MISPU cycle. The computer sent driving commands via a COM port to the control centre and digital pressure actuator. The digital pressure commands were then split by six plastic tubes to the valves and pistons on the microchip.

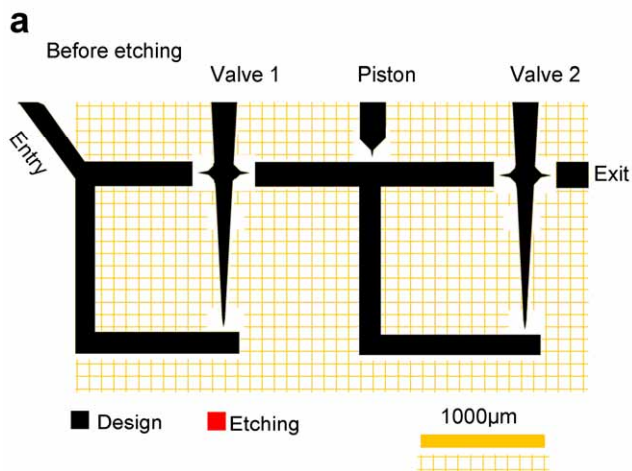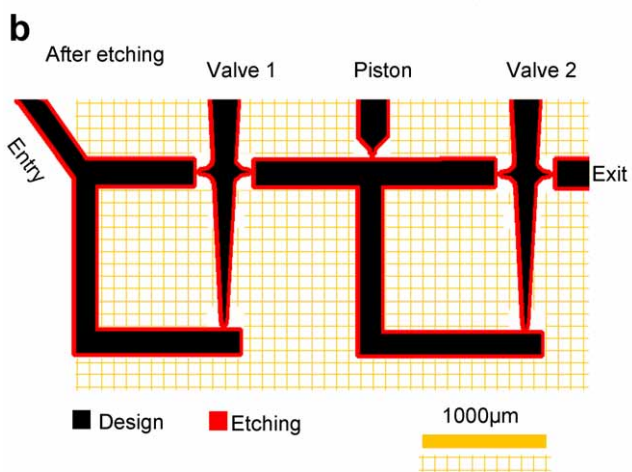

**Fig. S2 Glass etching.** The valves and pistons were design on a photomask (a). The channels on photomask were separated by a distance of 75µm. After glass etching (40µm) (b), the patterns on the glass chip expanded and channels contacted each other to form MISTAs for gas-liquid interface blocking.

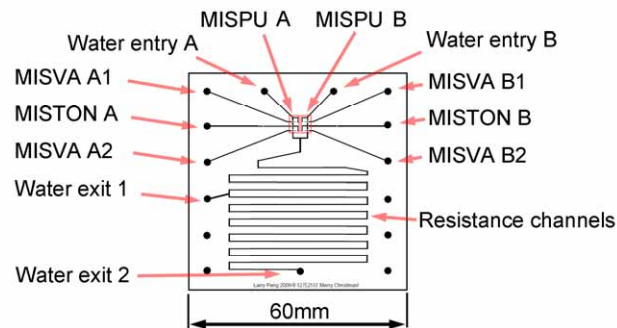

10

**Fig. S3 Glass chip design.** The glass chip contains two MISPU (MISPU A and MISPU B). Each MISPU has its own entry and valves and pistons. The two MISPU have a conjunct zigzag channel (resistance channel) as an exit (short for exit 1 and long for exit 2).

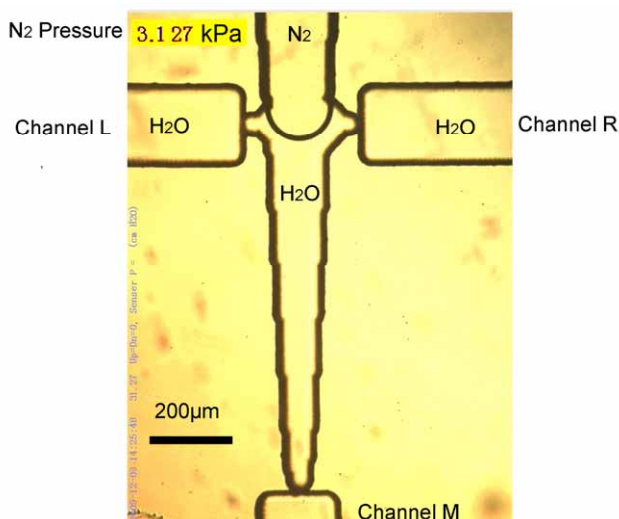

15

**Video 1 The pressure responses of a MISVA.** The MISVA, including the three channel (L, R and M), was filled with water. Gas pressure ( $N_2$ ) drove the gas-water interface into the valve. The moving distance of the interface was measured. Pressure on channel L, R and M were set to 0.

20

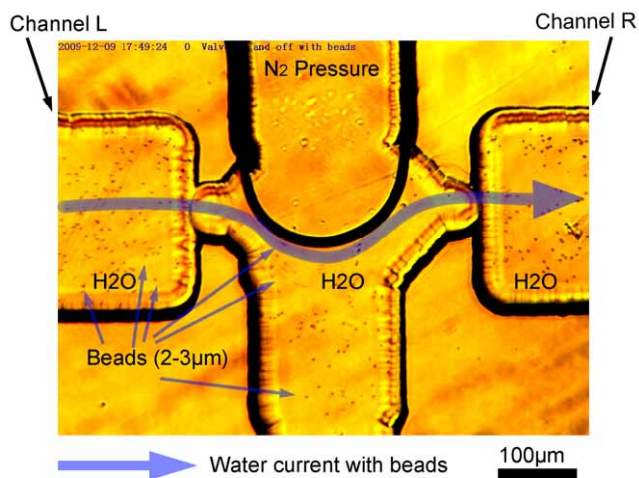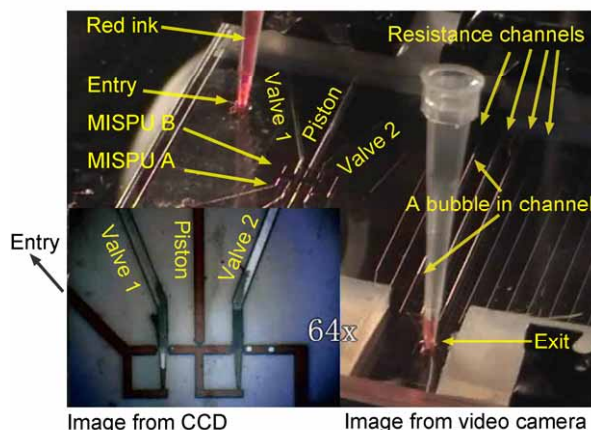

10

**Video 2 The flow controlled by MISVA.** Flow from channel L to channel R was driven by pressure difference. The movement of the interface controlled by N<sub>2</sub> pressure closed or opened the valve to interrupt the flow or to bring back the flow.

**Video 4 The working of a MISPU.** The working state was shown by a microscope CCD and the whole microchip was shown by a video camera (SONY). Red ink filled the entry and MISPU B pumped the red ink into the resistance channel. The pump's power was strong enough to drive a long bubble in the resistance channel into the tip on top of the exit.

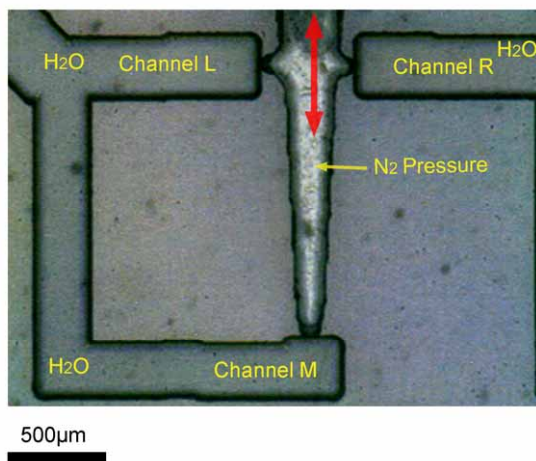

**Video 3 A long term valve tests.** A MISVA opened and closed 2000 times in 1000s. The red arrow shows the gas-water interface moving back and forth driven by digital pressure.

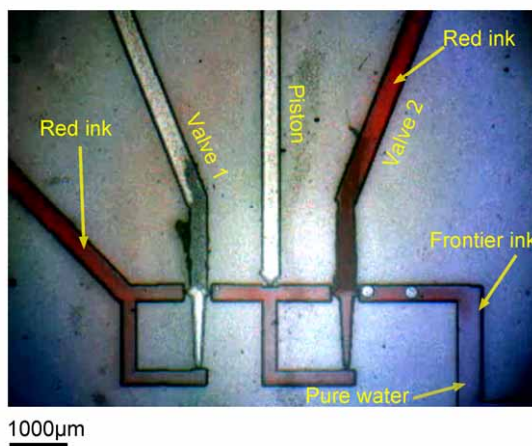

**Video 5 The pumping mechanism of MISPU.** The MISPU was pumping pure water followed by red ink. The frontier of ink depicts the movements of liquid in a working MISPU.

20

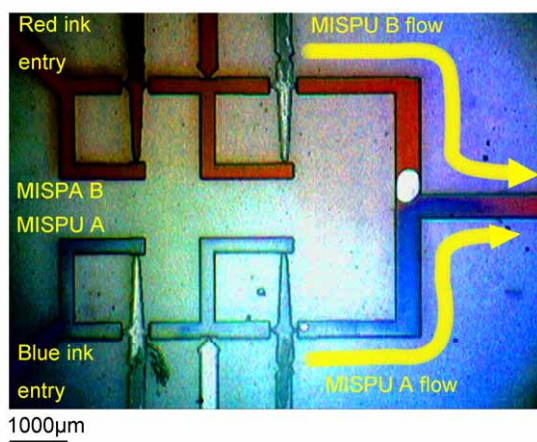

**Video 6 A dual MISPU.** Two MISPUs were integrated together on the chip. Each MISPU (A and B) was pumping different ink (A for blue and B for red).

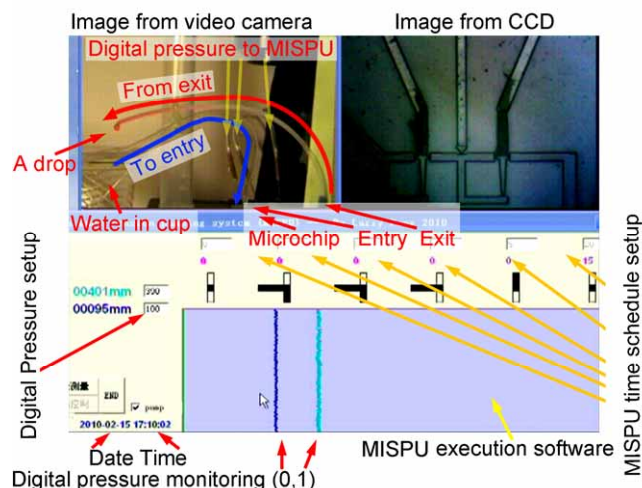

**Video 8 A durability test of a MISPU.** The digital pressures and the pumping time schedule were set by the MISPU execution software. The working state of the MISPU was monitored by a microscope CCD. The water in a cup was pumped up and back into the cup (recorded by a video camera). The tests lasted 7 days.

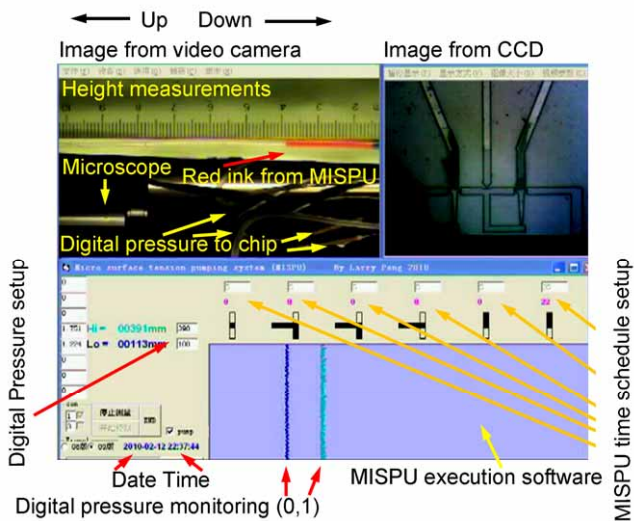

**Video 7 The pump output of a MISPU.** The digital pressures and the pumping time schedule were set by the MISPU execution software. The working state of the MISPU was monitored by a microscope CCD and the pump output measurement was recorded by a video camera (image lying down 90 degree of counter clockwise).

## Notes and references

*Department of Biology, Xiamen University, Xiamen, Fujian, China 361005. E-mail: xypeng@xmu.edu.cn; Fax: +86-592-2181386; Tel: +86-592-2181386*
